1 **Consecutive signaling pathways are activated in progression of Duchenne muscular**  
2 **dystrophy in *C. elegans***

3  
4 Heather C Hrach<sup>1,2</sup>, Hannah S Steber<sup>3</sup>, Jason Newbern<sup>4</sup>, Alan Rawls<sup>4</sup> and Marco  
5 Mangone<sup>2\*</sup>

6 <sup>1</sup>Molecular and Cellular Biology Graduate Program, School of Life Sciences 427 East Tyler  
7 Mall Tempe, AZ 85287 4501.

8 <sup>2</sup>Virginia G. Piper Center for Personalized Diagnostics, The Biodesign Institute at Arizona  
9 State University, 1001 S McAllister Ave, Tempe, AZ, USA

10 <sup>3</sup>Barrett Honors College, Arizona State University, 751 E Lemon Mall, Tempe, AZ 85281

11 <sup>4</sup>School of Life Sciences 427 East Tyler Mall Tempe, AZ 85287 4501

12

13 \* To whom correspondence should be addressed. Tel: +1(480) 965-7957; Fax: +1(480)  
14 965-3051; Email: mangone@asu.edu

15 Present Address: Marco Mangone, Arizona State University, Biodesign Institute Building  
16 A, 1001 S McAllister Ave, Tempe, AZ 85281 USA

17

18 **Short title:** Duchenne muscular dystrophy in *C. elegans*

19

20 **One Sentence Summary:** A tissue specific transcriptome analysis of dystrophin deficient  
21 muscle in *C. elegans* reveals that dystrophin has distinct, dynamic signaling roles in early  
22 and late stage progression of Duchenne muscular dystrophy.

23

## ABSTRACT

24 **Background:** Duchenne muscular dystrophy (DMD) is a lethal, X-linked disease  
25 characterized by progressive muscle degeneration. The condition is driven by nonsense  
26 and missense mutations in the dystrophin gene, but the resulting changes in muscle-  
27 specific gene expression that take place in dystrophin's absence remain uncharacterized,  
28 as they are potentially obscured by the chronic inflammation elicited by muscle damage in  
29 humans. *C. elegans* possess a mild inflammatory response that allows for the  
30 characterization of the transcriptome rearrangements affecting disease progression  
31 independently of inflammation.

32 **Results:** In effort to better understand these dynamics we have isolated and sequenced  
33 body muscle-specific transcriptomes from *C. elegans* lacking functional dystrophin at  
34 distinct stages of disease progression. We have identified two consecutively altered gene  
35 networks, which are also disrupted in the dystrophin deficient *mdx* mouse model. We  
36 found an upregulation of genes involved in mitochondrial function early in disease  
37 progression, and an upregulation of genes related to muscle fibre repair in later stages.  
38 This suggests that dystrophin may have a signaling role early in development, and its  
39 absence may activate compensatory mechanisms that counteract muscle degradation  
40 caused by loss of dystrophin. We have also developed a temperature-based screening  
41 method for synthetic paralysis that can be used to rapidly identify genetic partners of  
42 dystrophin.

43 **Conclusions:** Our results allow for the comprehensive identification of transcriptome  
44 rearrangements that potentially serve as independent drivers of disease progression and  
45 may in turn allow for the identification of new therapeutic targets for the treatment of DMD.

46

## BACKGROUND

47

48           Duchenne muscular dystrophy (DMD) is an X-linked, recessive disease caused by  
49 out of frame mutations in the dystrophin gene [1]. The dystrophin gene codes for a  
50 structural protein found beneath the sarcolemma, where it is anchored both to the  
51 dystrophin glycoprotein complex (DGC) and cytoskeletal actin, thus stabilizing the protein  
52 complex and the integrity of the cell membrane [2]. In humans, the absence of functional  
53 dystrophin results in progressive degeneration of the skeletal and cardiac muscles. The  
54 hallmark symptoms of DMD extend beyond muscle degeneration to include respiratory  
55 failure, cardiomyopathy, and pseudohypertrophy. The condition remains the most  
56 commonly diagnosed type of muscular dystrophy, affecting approximately 1 in 3,500 male  
57 births globally.

58           While the role of dystrophin in forming a physical connection between the  
59 extracellular matrix (ECM) and cytoskeleton has been well characterized [3], a  
60 comprehensive molecular definition of dystrophin's function is not fully understood.  
61 Vertebrate models of DMD include the *mdx* mouse [4] and the golden retriever muscular  
62 dystrophy canine [5]. Both models have contributed significantly towards our  
63 understanding of dystrophin function, but they face limitations when studying the cell  
64 autonomous effects of dystrophin deficiencies on skeletal muscle independently of the  
65 myolysis and fibrosis associated with chronic inflammation observed in mammals. In  
66 addition, *mdx* mice do not breed well, making them difficult to use to study molecular  
67 mechanisms using approaches like genome wide screens and other large-scale studies [6,  
68 7].

69 Mitochondrial dysfunction and systemic deregulation of cellular energy homeostasis  
70 have been observed in both in DMD patients and *mdx* mice [8-10]. Mitochondria are  
71 important players in this disease, as a steady-state flux of ATP, Ca<sup>+</sup> and other  
72 components of energy metabolism are needed for muscle contraction. A recent study  
73 identified a significant increase in enzymes that are major consumers of NAD<sup>+</sup> in  
74 dystrophic muscle tissues, and its replenishment was shown to ameliorate paralysis in  
75 *mdx* mice and *C. elegans* [8]. Evidence shows that mitochondria play a pivotal role in  
76 disease progression. However, it is still not clear if mitochondrial dysfunction is induced by  
77 the loss of muscle fibres, which in turn induce muscle paralysis and necrosis, or if it occurs  
78 in early stages of the disease when the paralysis and loss of muscle tissue has not yet  
79 been initiated [11].

80 The invertebrate model *C. elegans* has the potential to address these questions and  
81 serve as an informative model system for DMD. These nematodes possess a singular  
82 ortholog of the dystrophin gene (*dys-1*), which is similar in protein size to the human  
83 dystrophin gene, and contains similar actin binding and scaffolding regions, which are  
84 used to bridge the dystrophin complex to cytoskeletal actin (**Fig. 1A**). Additionally, several  
85 essential members of the DGC are conserved between humans and nematodes. The *C.*  
86 *elegans* DGC is largely comparable to the human complex, and includes key proteins such  
87 as dystrobrevin (*dyb-1*), sarcoglycans (*sgca-1*, *sgcb-1* and *sgn-1*), and the syntrophins  
88 (*stn-1* and *stn-2*). This predicts strong selective pressure for functional conservation of the  
89 DGC from *C. elegans* to humans.

90 *C. elegans* myogenesis has been extensively characterized [12], with only two main  
91 types of muscles: obliquely striated and nonstriated [13]. Many structural muscle proteins

92 are also conserved between worms and humans, suggesting a maintained functional  
93 mechanism of contraction (**Fig. 1B**).

94 The *C. elegans* mutant strains *dys-1(cx18)* and *dys-1(eg33)* were recently  
95 introduced and represent a novel tool to study DMD *in vivo* [14, 15]. These mutant strains  
96 contain different nonsense mutations leading to the expression of a truncated DYS-1,  
97 which lacks the essential scaffolding portion of the C-terminus (**Fig. 1C**). *dys-1* gene  
98 expression is restricted to the worm body and vulva muscles. Mimicking the human  
99 condition, early reports have shown that loss of *dys-1* does not result in dramatic muscular  
100 degeneration phenotypes in juvenile worms. Instead they display defects in motility that  
101 are phenotypically distinct and associated with the loss of *dys-1*. This includes anomalous  
102 bending of the head, hyperactivity, and slight hyper contraction of the body wall muscle in  
103 early stages accompanied by an age-dependent, progressive loss of locomotor function  
104 (**Fig. 1D**). In later stages, *dys-1* worm strains exhibit increased muscle cell death,  
105 attenuated motility and have shorter lifespans than *wt* worms (**Additional File 1: Figure**  
106 **S1**) [15].

107 Both *dys-1* worm strains display similar disease phenotypes, suggesting that both  
108 mutations, although in different portions of the *dys-1* gene, affect similar pathways. The  
109 introduction of human *dystrophin* cDNA in these mutant worms rescues these phenotypes  
110 [15], suggesting they are indeed a highly appropriate disease model.

111 *C. elegans* possess an innate immune response; the adaptive immunity is primitive  
112 and cell-mediated immunity is absent [16], leading to minimal muscle inflammation in *dys-*  
113 *1(cx18)* and *dys-1(eg33)* strains. The absence of chronic inflammation, which normally  
114 leads to myofiber necrosis and fibrosis in DMD patients or mouse models, causes these

115 worm strains to move somewhat similarly to *wt* worms. Paralysis is subtle, localized to  
116 specific areas, and becomes most apparent in adult worms (**Fig. 1E**). Because the muscle  
117 tissues in these strains are not being actively damaged by chronic inflammation as in  
118 patients with DMD and *mdx* mice, this model is unique in its ability to study the cell  
119 autonomous contribution of changes in gene expression in the absence of muscle  
120 inflammation (**Fig. 1E**).

121 Although they were initially very promising, these two strains were not fully adopted  
122 by the community along with the *mdx* mouse, as a comprehensive analysis on the extent  
123 to which nematodes mimic the human version of the disease remained to be  
124 characterized. Additionally, these strains lacked a quantifiable phenotype that was easy to  
125 score, which initially prevented the development of large-scale genetic screens for the  
126 identification of therapeutic targets.

127 Our lab has previously adapted an established technique, which optimizes tissue-  
128 specific RNA extraction from intact organisms [17], allowing the identification of tissue-  
129 specific transcriptomes at single-base resolution [18-20]. This method, named PAT-Seq,  
130 takes advantage of the binding affinity and specificity of the cytoplasmic PolyA Binding  
131 Protein (PABPC1) to polyA tails of mRNAs [21], which after UV crosslinking is  
132 immunoprecipitated, released from the tissue-specific polyA+ RNAs and the resultant  
133 transcripts are sequenced. *pab-1* is the worm ortholog of PABPC1, and by expressing this  
134 FLAG-tagged gene using MosSCI single copy integration technique in different worm  
135 tissues, our lab recently profiled *C. elegans* intestine, pharynx and body muscle tissues  
136 [18]. This study allowed us to define the body muscle transcriptome. We detected 2,610  
137 genes expressed in this tissue, with only 329 unique genes corresponding to 365 spliced

138 isoforms [18]. The list of top ten genes in the body muscle dataset was also enriched for  
139 muscle-specific genes such as myosin and actin isoforms. This study also detected a  
140 unique muscle-specific gene pool, including previously identified genes members of the  
141 *dystrophin* complex in human, such as dystroglycan, syntrophin, alpha-dystrobrevin, and  
142 dystrophin, the calveolin family, and type IV collagen.

143 In order to identify high quality cell-specific muscle specific transcriptome changes  
144 occurring in DMD, we crossed the *dys-1(cx18)* and *dys-1(eg33)* strains with our *myo-*  
145 *3p::GFP::pab-1::3xFLAG* worm strain (PAP) [18] (**Fig. 2A**), producing two novel strains  
146 named DP1 and DP2 respectively, which allowed the extraction and sequencing of high  
147 quality muscle-specific transcriptomes in worms lacking the dystrophin protein at different  
148 stages of the disease. This approach allowed us to fully define the dynamic transcriptome  
149 rearrangements occurring in the absence of inflammation at controlled time points, before  
150 and after the onset of paralysis. We have also performed targeted genetic experiments to  
151 study the contribution to paralysis of selected genes identified by our approach.

152 We have found that the absence of dystrophin first results in the deregulation of  
153 mitochondrial function prior to muscle paralysis. This impairment leads to differential  
154 expression of genes involved in muscle function and differentiation after the paralysis  
155 occurs perhaps as a part of a compensatory mechanism that is able to impede dystrophin-  
156 dependent muscle degeneration.

157

158

## RESULTS

159

160 **Pat-Seq from muscle tissues of *C. elegans* strains lacking a functional copy of the**  
161 **dystrophin gene produced high quality muscle specific RNAs**

162 In order to perform PAT-Seq in *C. elegans* dystrophin deficient muscle tissues, we  
163 have taken advantage of the previously existing PAT-Seq technology used in our previous  
164 studies [18, 19]. The original PAP strain expresses the gene *pab-1* fused to GFP (N-  
165 terminus) and a 3xFLAG tag (C-terminus) restricted in the muscle tissue [18, 19]. *pab-1* is  
166 the *C. elegans* ortholog of the human cytoplasmic polyA binding protein (PABPC1), which  
167 typically binds the polyA track of mature mRNAs in the cytoplasm and is required for  
168 translation [22].

169 We have crossed the worm strain *myo-3p::GFP::pab-1::3xFLAG* (PAP) with *dys-*  
170 *1(cx18)* and *dys-1(eg33)* and prepared two new strains named DP1 and DP2. The two  
171 new strains retain the *dys-1* mutations *cx18* and *eg33*, and express the muscle specific  
172 PAP transgene, which allows the muscle specific immunoprecipitation step using our *pab-*  
173 *1* based strategy. These two new strains (*dys-1(eg33)/pap* (DP1) and *dys-1(cx18)/pap*  
174 (DP2) were verified using Sanger sequencing to confirm the presence of the nonsense  
175 mutations in the *dys-1* gene in the crossed F1 worms that were GFP-positive in the muscle  
176 tissues (**Fig. 1C**). We also used a PCR approach to confirm the genomic integration of the  
177 PAP construct in the MosSCI locus [23] (**Fig. 1C**). In order to further validate our cross, we  
178 subjected these worm strains to a Kaplan-Meier survival analysis (**Additional File 1:**  
179 **Figure S1**). The average lifespan of N2 worms in this experiment is approximately 21  
180 days, and both new strains behave very similarly to their reciprocal pre-crossed strain, with  
181 their lifespan drastically declining at day 18, with an overall increase in lethality when  
182 compared to *wt* worms (**Fig. S1**). Taken together these results suggest 1) we successfully



183 crossed both dystrophin deficient strains with our PAP strain, and 2) the DP1 and DP2  
184 strains reflect the phenotypes already characterized in the literature before and after our  
185 crosses, suggesting our PAP construct did not interfere with the *dys-1* phenotype.

186 We next performed the PAT-Seq experiments, isolating and sequencing muscle  
187 specific mRNAs from DP1 and DP2 strains. We wanted to detect precise changes in gene  
188 expression, not only in later stages of paralysis, but also before the paralysis was initiated,  
189 to have a more comprehensive overview of the dynamic gene changes occurring during  
190 the initiation and the progression of the disease. In addition, we wanted to reduce our  
191 sample number to simplify the data analysis and increase the depth of our sequencing  
192 results. Therefore, we decided to grow a large mixed population of our crossed worms,  
193 and then performed sequential mechanical filtrations by size, which led to the isolation of  
194 two pools of worms for each strain: one containing smaller and mildly phenotypic embryo-  
195 L2 worms, which we labeled 'pre-symptomatic' (PRE), and another containing larger and  
196 more extensively phenotypic L3-adult worms, which we labeled 'post-symptomatic' (POST)  
197 **(Fig. 2)**.

198 We performed a total of 16 immunoprecipitations (see materials and methods),  
199 sequencing and analyzing DP1 and DP2 mixed stage samples, and PRE and POST  
200 paralysis samples in duplicate.

201 We obtained approximately 900M reads across all our sequenced samples, with  
202 approximately 50M reads each dataset (**Additional File 1: Table S1**). Within these  
203 samples we were able to map 42% of the reads to the *C. elegans* genome (WS250)  
204 (**Additional File 1: Table S1**). Both experimental and biological replicates in each dataset  
205 correlate well with each other (**Additional File 1: Figure S2**), with ~2,000 shared protein

206 coding genes within each group (**Additional File 1: Table S2**). The total and mapped  
207 reads for each sample are listed in **Additional File 1: Table S3**.

208 Our sequencing efforts detected a total of 3,748 genes across all datasets  
209 (**Additional File 1: Figure S3A**). Within this group 47% have been previously mapped in  
210 the body muscle [19] (**Additional File 1: Figure S3A**). When we repeated this analysis  
211 separately in our PRE and POST datasets, this percentage increases to ~60% similarity  
212 (**Additional File 1: Figure S3A**), with >85% identity in our top 250 genes in all our  
213 datasets (**Additional File 1: Figure S3B**).

214 Taken together, these results suggest that our muscle specific RNA pull down was  
215 successful and able to identify *bona fide* muscle specific genes.

216

### 217 **Mitochondrial response is involved in the initiation of paralysis in our PRE dataset**

218 The PRE symptomatic dataset is mainly composed of embryo to L2 mildly  
219 symptomatic worms. We obtained 1,932 protein coding genes expressed in this group,  
220 with 176 unique genes not expressed elsewhere (**Fig. 3** and **Additional File 1: Table S3**).  
221 There are very few genes that change drastically in expression level between the *wt* and  
222 PRE dataset (**Fig. 3**). A GO term analysis on the top 50 genes identified an enrichment in  
223 genes involved in nematode larval development and locomotion, such as *cah-4*, *dpy-30*,  
224 *ran-1*, *ceh-20*, *vab-15*, *ned-8*, *rpi-1*, *uri-1*, *tfg-1*, and *bus-8*.

225 We also detect an unusual abundance of mitochondrial genes involved in ATP  
226 production and regulation of apoptotic processes within the top hits identified in our PRE  
227 dataset (**Fig. 3**). *ant-1.1* is an ADP/ATP translocase with a three-fold increase over the  
228 median between DP1 and DP2 datasets (when compared with the *wt* PRE dataset). This

229 mitochondrial membrane receptor is responsible for transporting ATP synthesized from  
230 oxidative phosphorylation into the cytoplasm and absorbs back ADP in a 1:1 molar ratio  
231 [24, 25].

232 The genes Y69A2AR.18 (5-fold), F58F12.1 (3-fold), *icd-1* (2.5-fold), H28O16.1 (2-  
233 fold), *atp-3* (2-fold) are all mitochondrial ATP synthase subunits involved in the synthesis  
234 of ATP from ADP and inorganic phosphate.

235 Only 173 genes were uniquely detected in this stage that were absent in our *wt*  
236 control, and are most likely the direct result of the initiation of the disease. Most of these  
237 genes have an unknown function, but when aligned to the human proteome many of them  
238 show significant matches to known genes. *smo-1* is among those significantly abundant.  
239 *smo-1* is the *C. elegans* homolog of SUMO, a small ubiquitin-like signaling modifier that is  
240 attached to protein dictating localization and function.

241

## 242 **Genes involved in myogenesis and muscle contraction are overexpressed in the** 243 **POST dataset**

244 In our POST dataset we detected 2,273 protein-coding genes, which accounts for  
245 only 58% of genes in common with the PRE dataset (**Fig. 3** and **Additional File 1: Table**  
246 **S3**). This discrepancy is consistent with the progressive nature of the disease and the  
247 associated changes in muscle structure and overall health.

248 Essential constituents of the mitochondrial metabolism are also overexpressed at  
249 this stage, although at lower levels than in our PRE dataset. They include the mitochondria  
250 ATP synthase *lcd-1*, *ant-1.1*, H28O16.1, Y69A2AR.18, *atp-2* and *atp-3*, *nduo-1* (NADH-  
251 ubiquinone oxidoreductase), and W09C5.8 (cytochrome c oxidase).

252           Importantly, we detected an abundance of genes involved in myogenesis; including  
253 *mlc-1* and *mlc-2* (myosin light chain), *mup-2* (troponin), *act-1* (actin), *unc-27* (troponin), *lev-*  
254 *11* (tropomyosin), and *unc-15* (paramyosin). This result is surprising, as an increase in  
255 sarcomeric gene transcription is consistent with muscle hypertrophy or active replacement  
256 of muscle, which does not occur in *C. elegans* as they lack a satellite cell equivalent. In  
257 this context, the increase in transcription may suggest a hidden compensatory signaling  
258 pathway activated in the absence of *dys-1* that precedes cell death.

259           Only 38 genes are uniquely present in our POST dataset, and the majority of these  
260 genes have unknown functions.

261

## 262 **A novel synthetic screen to identify genetically linked *dys-1* targets**

263           Our approach identified specific genes differentially regulated in both dystrophin  
264 deficient samples across replicates. These genes were categorized by function, and  
265 among several trends, we identified an enrichment in our pre dataset of genes involved in  
266 mitochondrial metabolism, and the establishment and maintenance of muscle structure  
267 and function in our POST dataset.

268           In order to validate and expand the biological significance of these results, we  
269 decided to perform a targeted genetic screen testing genes identified by PAT-Seq for their  
270 ability to enhance muscle damage in dystrophin deficient strains when knocked down  
271 through RNAi. We reasoned that if there were genetic compensatory mechanisms in place  
272 to counteract paralysis, the knock down of upregulated genes detected in our screen  
273 would lead to detectable impairment of muscle viability that would suggest a genetic link  
274 between *dys-1* and the tested genes.

275 The *dys-1* phenotype is subtle when compared to *wt* worms. For this reason, we  
276 decided to use a previously established strain that uses a background mutation to  
277 enhance paralysis to create a more definitive and scorable phenotype.

278 It has been previously shown that combining dystrophin mutations with mutations  
279 in the transcription factor MyoD exacerbates dystrophic phenotypes in mice, and that this  
280 combination has a similar effect in *dys-1* strains [26]. The temperature sensitive strain *hlh-*  
281 *1(cc561ts)* contains a hypomorphic mutation in the *C. elegans* homologue of MyoD, *hlh-1*,  
282 which renders these strains viable at the permissive temperature 15°C and severely  
283 uncoordinated with defects in body muscle morphology at non-permissive temperatures  
284 above 20°C [27].

285 We utilized this single mutant strain *hlh-1(cc561ts)*, as well as the double mutant  
286 strain *dys-1(cx18); hlh-1(cc561ts)*, and observed that at 15°C (permissive), both single and  
287 double mutant strains hatch and develop to adulthood without defects. In order to  
288 ameliorate the uncoordinated defects and lethality obtained at 20°C, we decided to  
289 decrease this temperature to 18°C (semi-permissive). At 18°C, ~75% of the single  
290 mutants, and ~50% of the double mutants are still viable (**Fig. 4A-B**), providing us with a  
291 distinct and tractable range to detect changes in incidence of paralysis following the RNAi  
292 experiments (**Fig. 4C**).

293 Populations were synchronized and grown at 15°C (permissive) until they reached  
294 the L4 stage, and were then moved to a semi-permissive temperature of 18°C and allowed  
295 to lay eggs for 24 hours. At semi-permissive temperature, the single mutant strains *hlh-1*  
296 gave rise to progeny of which 26% developed with severe defects in body morphology and  
297 were almost completely paralyzed (**Fig. 4B**). Under the same conditions, the double

298 mutant strains *hlh-1*; *dys-1* yielded a 21% increase in paralysis and severe defects in body  
299 morphology (**Fig. 4A-B**).

300 We then selected a subset of representative genes identified by PAT-Seq as being  
301 upregulated at different degrees, which are indicated with an asterisk in **Additional File 1:**  
302 **Table S3**. These genes were also chosen based on function, primarily because of their  
303 known roles in mitochondrial metabolism, muscle structure, and signaling function (**Fig.**  
304 **4C**). We speculated that if these genes were indeed abundant in paralyzed worms as a  
305 compensatory mechanism to counteract paralysis, their depletion in the double mutant  
306 background would enhance paralysis when compared to the single mutant background.

307 The RNAi experiments were performed at the semi-permissive temperature of  
308 18°C. Worms were scored for incidence of paralysis and morphological defects (**Fig. 4C**).  
309 The results between control and experimental strains were compared with each other, and  
310 then to the observed differences in semi-permissive experiments performed on single and  
311 double mutant strains in the absence of RNAi (**Fig. 4B**). As a control, we performed a  
312 knockdown of a known member of the nematode DGC, *dyb-1*. The knockdown of *dyb-1*  
313 was able to increase incidence of paralysis in the single mutant to an extent that reflected  
314 the double mutant in semi permissive control experiments (**Fig. 4D**).

315 We then tested our muscle and signaling pools. Although some of the genes were  
316 synthetic lethal in combination with the *hlh-1* background mutation (*act-1*, *cmd-1*, *unc-27*  
317 and *unc-15*), and could not be tested further, the majority of genes tested were able to  
318 enhance paralysis, although to different degrees (**Fig. 4E**) (**Additional File 1: Table S3**).

319

320

## DISCUSSION

321

322           Here we have described the use of the nematode *C. elegans* to study the cell  
323 autonomous molecular events associated with the functional loss of the dystrophin gene  
324 that leads to Duchenne muscular dystrophy in humans. We have performed genetic  
325 crosses to establish transgenic strains that serve both as a model for DMD, and as a  
326 functional tool to perform high quality, muscle specific RNA-IPs at a resolution that has not  
327 yet been achieved. Using these strains, we have sequenced and analyzed muscle specific  
328 transcriptomes at distinct developmental stages during disease progression, and identified  
329 several differentially regulated pathways in dystrophic nematode muscle.

330           We have also developed a novel, temperature-based genetic screen and performed  
331 a quantitative analysis to assess the functional significance of the identified genes in the  
332 viability of muscle cells, thus confirming their contribution towards DMD initiation and  
333 progression. This approach will allow a direct evaluation the role of specific genetic  
334 pathways in the clinical severity of DMD, which will be fruitful in developing drug targets for  
335 treating DMD patients.

336           Our dystrophin deficient strains DP1 and DP2 display phenotypes and altered  
337 molecular pathways that are very similar to those observed in *mdx* mice and DMD  
338 patients, strongly implying that this model system phenocopies many aspects of the  
339 disease at the molecular level.

340           These new strains recapitulate phenotypes previously characterized in the literature  
341 for *dys-1(cx18)* and *dys-1(eg33)*, with shortened average and maximum lifespan,  
342 hyperactivity and excessive bending of the head [14, 15] (**Additional File 1: Figure S1**),  
343 suggesting that introducing the PAP cassette into the *dys-1* genetic background has not

344 altered the *dys-1* phenotype. In addition, the muscle morphology of both *dys-1* strains is  
345 highly similar to wild type muscle, as the muscle fibres do not present gross defects in  
346 morphology.

347 Our muscle specific sequencing approach in *C. elegans* allowed us not only to  
348 bypass the noise introduced by the immune response, as in *mdx* mice, but also to profile  
349 muscle tissue without contamination. Isolating pure muscle tissue from mice and patients  
350 is challenging, and although results are very informative and shed light on progression of  
351 DMD [28, 29], these samples are potentially contaminated with myofibroblasts, connective  
352 tissue, inflammatory cells, nerves and endothelial cells, and the results may be difficult to  
353 reproduce or validate due to intrinsic sample variation within experiments. Our approach  
354 bypassed these issues, providing the community with high-quality muscle-specific  
355 transcriptomes in the absence of functional dystrophin with minimal contamination and at  
356 single-base resolution.

357 Our study uncovered ~ 2,000 protein coding genes present in early and late stage  
358 dystrophic muscle. Many of these genes are expressed in the muscle, and replicate what  
359 we already profiled in this tissue (**Additional File 1: Figures S3A-B**). Combined with a  
360 strong correlation observed between our biological replicates (**Additional File 1: Figure**  
361 **S3C**), these results suggest that our approach can accurately and consistently detect  
362 transcripts between biological replicates.

363 Because our approach is biochemistry-based, we were concerned about a high  
364 signal-to-noise ratio, which would have prevented the identification of fine genetic changes  
365 in our PRE and POST datasets. For this reason, we have applied a stringent bioinformatic  
366 filter to our datasets, restricting our analysis to the top 30-40% of the total genes identified



367 in this study (**Additional File 1: Figure S3D**), which may have in turn lowered the number  
368 of genes considered, but provided us with higher quality results (**Additional File 1: Figure**  
369 **S3D**).

370 Our study revealed two distinct sets of genes that contribute to the DMD phenotype  
371 in *C. elegans*; the first set is activated before paralysis and participates in mitochondrial  
372 homeostasis, cell death and protein degradation signaling in the muscle, and the second  
373 set is activated at or after the onset of paralysis and is responsible for the establishment  
374 and maintenance of muscle structure.

375 Although there have already been studies in *mdx* mice that have reported the  
376 involvement of both pathways in DMD progression [9, 14, 30], it was still unclear how  
377 these two pathways are intertwined with each other, and in what order these molecular  
378 events occur. This question is important, as impaired mitochondrial metabolism has been  
379 already observed in *mdx* myoblasts in which a functional DGC has not yet been  
380 assembled [31], suggesting that these two pathways may be somewhat independent.

381 More precisely, it is still unclear if the damage incurred by muscle tissue in  
382 absence of dystrophin leads to an increase of extracellular Ca<sup>2+</sup> accumulation in muscle,  
383 which in turn causes mitochondrial membrane potential to collapse, or if the altered ATP  
384 synthesis in the mitochondria in the muscle tissue before paralysis causes muscle  
385 weakness, instability and degradation.

386 Our results suggest that these two pathways may not occur simultaneously; the  
387 mitochondrial dysfunction is detected early in disease progression, in accordance with  
388 previous findings [9], either before paralysis is initiated or while it is still mild.

389 In the PRE dataset we detected the differential regulation of many mitochondrial  
390 genes involved in glycolysis and ATP/ADP transport (**Fig. 3 and Additional File 1: Table**  
391 **S5**). Proteomics studies in *mdx* mice support these results [9]. Muscle contraction is  
392 dependent upon ATP production and usage, and its abundance is tightly regulated in  
393 healthy muscles.

394 Aberrant mitochondrial activity has been previously reported in patients and animal  
395 models with DMD [8, 32-36], even prior to dystrophin assembly at the sarcolemma [31]. In  
396 this context, our results validate these studies and highlight an important signaling role for  
397 *dys-1*, which evidently functions outside of its accepted role as a scaffolding protein in the  
398 DGC.

399 After the onset of paralysis in post-symptomatic samples, while the mitochondrial  
400 dysfunction is still present, we detect a second pathway, which perhaps tries to actively  
401 compensate for the loss of muscle structure by overexpressing genes involved in muscle  
402 formation. We do not know if these transcripts are indeed carrying out a compensatory  
403 mechanism, and more experiments need to be performed to further validate this finding. Of  
404 note, many of them were able to enhance paralysis in our RNAi experiments in **Fig. 4C**,  
405 suggesting that they are functionally translated.

406 Our RNAi experiments in **Fig. 4** most effectively screen for genes that play a role in  
407 the muscle and work cooperatively with dystrophin beginning early in development. The  
408 effects of RNAi knockdown are scored in the first hours after L1 animals hatch. In this light,  
409 the results of our semi permissive control experiments show that the absence of  
410 dystrophin is able to affect the very early development of the embryos that ultimately hatch  
411 with severe muscle defects. This underscores our sequencing results in PRE datasets that

412 suggest dystrophin may play an early role, both in development and in regulating  
413 mitochondrial function, and is not simply a structural gene whose absence can impair  
414 developed muscle after continuous contraction throughout an organism's lifespan.

415 The changes in gene expression observed in our POST dataset suggest that many  
416 of the genes acting as structural units within the sarcomere are involved in the progression  
417 of dystrophin-induced muscle damage (**Fig. 3**). Our RNAi experiments in **Fig. 4** confirmed  
418 the involvement of these genes in DMD progression and verify their role in a  
419 compensatory mechanism that may allow *C. elegans* to increase transcription of muscle-  
420 structure related genes in response to muscle damage.

421 *mup-2*, a gene that codes for the ortholog of muscle protein troponin, was able to  
422 increase incidence of muscle defects and paralysis in the dystrophin deficient strain *dys-*  
423 *1(cx18)*; *hlh-1(cc561ts)*, without inducing the same effect on the control strain *hlh-*  
424 *1(cc561ts)*. In the same manner, the interference of *ttn-1*, an ortholog of the muscle protein  
425 titin, and *mhc-1*, an ortholog of myosin regulatory light chain, was able to increase  
426 incidence of muscle defects and paralysis in the dystrophin deficient strain *dys-1(cx18)*;  
427 *hlh-1(cc561ts)*, without inducing the same effect on the control strain *hlh-1(cc561ts)* (**Fig.**  
428 **4C**).

429 Taken together these results suggest that *mup-2*, *ttn-1*, and *mhc-1* are all genetically  
430 connected to *dys-1*, and are not only overexpressed as transcripts when paralysis occurs,  
431 but are also expressed as proteins, as their dosage is necessary to increase paralysis in a  
432 *dys-1* dependent manner.

433 Outside this group of genes selected because of their role in muscle structure, we  
434 also studied upregulated genes essential in several signaling pathways. *icd-1* is the  $\beta$

435 subunit of the nascent-polypeptide associated complex. It was significantly upregulated in  
436 POST symptomatic data sets, it mediates proteins transport to mitochondria [37], and it is  
437 necessary and sufficient to suppress apoptosis [38]. *icd-1* knockdown induces a two-fold  
438 increase of incidence of muscle defect and paralysis in *dys-1* dependent manner (**Fig. 4B**),  
439 suggesting that these two genes are genetically connected.

440 An observed limitation in using our approach for RNAi screens was the incidence of  
441 synthetic lethality. When combined with background mutations in *hlh-1*, several genes  
442 involved in development of muscle proved to be embryonic lethal when knocked down.  
443 Because this synthetic lethality achieved the same penetrance in single and double mutant  
444 strains, it prevented the scoring of differences between the two strains. It is important to  
445 note that this did not occur in the bulk of our experiments that knocked down muscle  
446 specific genes, meaning it is still feasible to use the method to screen the majority of  
447 genes in the genome, both muscle specific and ubiquitously expressed. This screening  
448 method is also now mature for high throughput, genome wide RNAi screens. The system  
449 can easily be adapted to 96 well, liquid screens. This can in turn provide a platform for  
450 rapidly identifying potential therapeutic targets that can be first validated in mammalian  
451 model systems, and eventually considered as part of a treatment plan for human DMD  
452 patients.

453

454

## CONCLUSIONS

455 We have definitely characterized that the nematode *C. elegans* fully mimics the  
456 majority of human DMD symptoms. The mitochondrial dysfunction previously observed in  
457 humans and vertebrate DMD muscle is also present in DMD worms, but is not induced by

458 muscle fiber lesions as previously found in *mdx* mice, instead it precedes the observed  
459 muscle damage and paralysis in late stage disease phenotypes. In response to  
460 mitochondrial dysfunction, *C. elegans* activate a compensatory pathway to upregulate the  
461 expression of muscle structure related genes to stave off paralysis, which could explain  
462 their lack of a strong paralysis as observed in DMD patients.

463

464

## METHODS

465

### 466 Preparation of the nematode strains

467 Body muscle specific PolyA-Pull expressing transgenic lines were obtained for  
468 previous crosses [18]. Young adult *C. elegans* worms were isolated on nematode growth  
469 media (NGM) agar plates seeded with OP50-1 and incubated at 31°C for 3.5 hours. Plates  
470 were then incubated for four days at 20°C and males were isolated from populations.  
471 Groups of five males were paired with 10 L4 hermaphrodites and incubated for 3 days at  
472 20°C. Crosses between PAP and *dys-1(cx18)* and *dys-1(eg33)* strains were screened for  
473 GFP fluorescence using a Leica DM13000B microscope, and crosses between *dys-*  
474 *1(cx18)* and *dys-1(eg33)* strains and VS21/DM8005 strains were screened for mCherry  
475 fluorescence using a Leica MZ10F microscope. Strains positive for fluorescent markers  
476 were subjected to Sanger sequencing for the verification of mutations in the dystrophin  
477 gene using the following primers: *dys-1(cx18)*\_F: GGCTTAATATGAGCTGGACGAAG,  
478 *dys-1(cx18)*\_R: CGCTGTCCATCTTCTTGTGG, *dys-1(eg33)*\_F:  
479 GGACGGTCATGCGACCC, *dys-1(eg33)*\_R: TTTGCACACGTTGCATTTGG. In order to

480 simplify the nomenclature, we have renamed the crossed strain *dys-1(eg33)/PAP* to DP1  
481 and the crossed strain *dys-1(cx18)/PAP* to DP2 throughout this manuscript.

482

### 483 **Preparation of PRE and POST symptomatic *C. elegans* PAT-Seq Strains**

484 *C. elegans* strains were divided into pre-symptomatic (PRE) and post-symptomatic  
485 (POST) pools using mechanical filtration using pluriStrainer cell strainers (pluriSelect).

486 Mixed stage populations were harvested from nematode growth media (NGM) agar plates  
487 seeded with OP50-1 and pelleted at 1,500 rpm. Solid pellets of approximately 2ml were  
488 sequentially pipetted through 40  $\mu$ m and 20  $\mu$ m nylon cell strainers to isolate an  
489 L3/L4/Adult population and an embryo/L1/L2 population, with the 40  $\mu$ m strainer retaining  
490 adult enriched populations, which were combined with the L3/L4 populations retained by  
491 the 20  $\mu$ m strainer.

492

### 493 **RNA Immunoprecipitation**

494 *C. elegans* strains used for RNA immunoprecipitations were maintained at 20°C on  
495 nematode growth media (NGM) agar plates seeded with OP50-1. Populations were  
496 passaged until a solid 1 ml pellet for mixed stage IPs and a solid 2 ml pellet for split stage  
497 IPs was obtained after centrifugation at 1,500 rpm. Harvested worms were then  
498 suspended and crosslinked in 0.5% paraformaldehyde solution for one hour at 4°C.  
499 Worms were pelleted at 1,500 rpm, washed with M9 buffer, and flash frozen in an ethanol-  
500 dry ice bath. Pellets are thawed on ice and suspended in 2 ml of lysis buffer (150 mM  
501 NaCl, 25 mM HEPES, pH 7.5, 0.2 mM dithiothreitol (DTT), 30% glycerol, 0.0625%  
502 RNAsin, 1% Triton X-100) [18]. Lysate was then subjected to sonication for five minutes at

503 4°C (amplitude 20%, 10 sec pulses, 50 sec rest between pulses) using a sonicator (Fisher  
504 Scientific), and centrifuged at 21,000 x g for 15 min at 4°C. 1 ml of supernatant was added  
505 per 100 µl of Anti-FLAG® M2 Magnetic Beads (Sigma-Aldrich) and incubated overnight at  
506 4°C in a tube rotisserie rotator (Barnstead international). mRNA immunoprecipitations  
507 were carried out as previously described [18, 19]. Total precipitated RNA was extracted  
508 using Direct-zol RNA Miniprep Plus kit (R2070, Zymo Research), suspended in nuclease  
509 free water and quantified with a Nanodrop® 2000c spectrophotometer (Thermo-Fisher  
510 Scientific).

511

## 512 **cDNA Library Preparation and Sequencing**

513 We prepared a total of 16 cDNA libraries from *dys-1(eg33)* mixed stages, DP1  
514 mixed stages , DP1 PRE1, DP1 PRE2, DP1 POST1, DP1 POST2, DP2 mixed stages,  
515 DP2 PRE1, DP2 PRE2, DP2 POST1, DP2 POST2, PAP mixed stages, PAP PRE1, PAP  
516 PRE2, PAP POST1 and PAP POST2. Each cDNA library was prepared using 100 ng of  
517 precipitated RNAs. cDNA library preparation was performed using the SPIA (Single Primer  
518 Isothermal Amplification) technology (IntegenX and NuGEN, San Carlos, CA) as  
519 previously described [18, 19]. cDNA was then sheared using a Covaris Covaris S220  
520 system (Covaris, Woburn, MA), and sample-specific barcodes were sequenced using the  
521 HiSeq platform (Illumina, San Diego, CA). We obtained ~60-90M mappable reads (1x75)  
522 each dataset.

523

## 524 **Bioinformatics Analysis**

525 Raw Reads Mapping: The raw reads were demultiplexed using their unique tissue-specific  
526 barcodes and converted to FASTQ files. Unique datasets were then mapped to the *C.*  
527 *elegans* gene model WS250 using the Bowtie 2 algorithm) [39] with the following  
528 parameters: --local -D 20 -R 3 -L 11 -N 1 -p 40 --gbar 1 -mp 3. Mapped reads were further  
529 converted into a bam format and sorted using SAMtools software using generic  
530 parameters [40].

531 Cufflinks/Cuffdiff Analysis: Expression levels of individual transcripts were estimated from  
532 the bam files by using Cufflinks software [41]. We calculated the fragment per kilobase per  
533 million base (FPKM) number obtained in each experiments and performed a pairwise with  
534 other tissues using the Cuffdiff algorithm [41]. We then used the median FPKM value  $\geq 1$   
535 between each replicate as a threshold to define positive gene expression levels. The  
536 results are shown in **Additional File 1: Tables S1-S3. Additional File 1: Table S4** was  
537 compiled using scores produced by the Cuffdiff algorithm [41] and plot using the  
538 CummeRbund package.

539

## 540 **Survival Curves**

541 Survival curves were performed as previously described [42]. Briefly, we prepared special  
542 NGM plates each containing 330  $\mu$ l of 150 mM FUDR (Sigma Life Sciences, Darmstadt,  
543 Germany). These plates were seeded with OP50-1 UV inactivated prior to plating worms  
544 to minimize contamination. We plated 25 L4 worms from each strain per plate, each  
545 across 3 replicate plates, and kept these plates in 18C incubators for the duration of the  
546 experiment. For each time point, the plates were recovered, and worms were visually  
547 inspected and counted directly in the plate using a dissection stereomicroscope (Leica



548 S6E) and a common cell counter. The strains were scored for survival every 48 hours, with  
549 survival being defined as pharyngeal pumping or the ability to move the head in response  
550 to prodding by a worm pick.

551

## 552 **RNAi screens at semi-permissive temperatures**

553 RNAi screens were performed using the temperature sensitive strains PD4605 (*hlh-*  
554 *1(cc561)*) and LS587 (*hlh-1(cc561); dys-1(cx18)*). Strains were synchronized with bleach  
555 as previously described [43] and eggs were incubated at permissive temperature (15°C)  
556 until populations reached young adult stage. Young adults were then plated on NGM  
557 plates seeded with OP50-1 with 5 worms per plate and incubated at semi-permissive  
558 temperature (18°C) for 24 hours to allow young adults to lay eggs. Plates were then  
559 recovered, and adult worms were removed, and plates containing eggs were returned to  
560 semi-permissive temperature to incubate for 24 hours. Plates were then scored for gross  
561 defects in body morphology and paralysis. We scored approximately 100 worms per plate  
562 across 5 replicate plates for each strain and each gene tested [44].

563

564

## 565 **ACKNOWLEDGMENTS**

566

567 **Funding:** This work was supported by the NIH grant 1R01GM118796.

568 **Author contributions:** We thank Stephen Blazie for the establishment of the PAP  
569 strains used for crosses and sequencing controls in this manuscript. We thank

570 Kasuen Kotagama for assistance in optimizing the PAT-Seq protocol. We thank  
571 Shannon O'Brien for assistance in RNAi experiments.  
572 **Competing interests:** The authors declare that they have no competing interests.

573

## 574 DATA AND MATERIALS AVAILABILITY

575 Raw reads were submitted to the NCBI Sequence Read Archive  
576 (<http://trace.ncbi.nlm.nih.gov/Traces/sra/>). The results of our analyses are available in  
577 Excel format as **Additional File 1: Table S3**.

578

579

580

## 581 MAIN FIGURES

582 **Fig. 1: *C. elegans* as a model system for human DMD.** (A) Diagram of functional protein  
583 domains in human dystrophin and the *C. elegans* ortholog *dys-1*. The functional domains  
584 of the human dystrophin protein are conserved in *C. elegans*. Mutational hotspot for DMD  
585 mutations in humans is labeled in red. The mutant strains *dys-1(cx18)* and *dys-1(eg33)*  
586 have nonsense mutations in the DMD ortholog *dys-1* in the actin binding and C-terminal  
587 scaffolding domains respectively. (B) A diagram of a human sarcomere highlights the  
588 human genes and associated *C. elegans* ortholog of several of the muscle structure  
589 related genes that were selected for RNAi screens. (C) DP1 and DP2 strains retain *cx18*  
590 and *eg33* mutations after being crossed with our PAP strain. Top panel: PCR analysis  
591 from genomic DNA extracted from *dys-1(eg33)*, *dys-1(cx18)*, DP1, DP2 and PAP strains.

592 “+” denotes primers pairs that confirm the presence of a single copy integrated construct,  
593 and “-” denotes primers pairs that confirm the absence of an integrated construct. Lower  
594 panel: Trace files produced from the sequencing of genomic PCR of the *dys-1* locus  
595 confirm the presence of the nonsense mutation in our DP1 and DP2 strains. After crosses  
596 were performed, DP1 and DP2 strains retain both the associated nonsense mutations in  
597 the dystrophin gene, and the presence of our integrated PolyA Pull construct. (D) *dys-1*  
598 strains *dys-1(cx18)* and *dys-1(eg33)* exhibit a head bending phenotype. *wt* head bending  
599 coincides with direction of movement (black arrows), while *dys-1* head bending opposes  
600 direction of movement. (E) Confocal images of *wt* (DM8005, [myo-3p::GFP::myo-3 + rol-  
601 6(su1006)]) and dystrophin deficient strains ([myo-3p::GFP::myo-3 + rol-6(su1006)];DP1)  
602 for myosin heavy chain fibres. Right panels show an enlargement of the head muscles in  
603 both strains. There are no major changes in muscle structure between *wt* and dystrophic  
604 muscle in *C. elegans*.

605

606 **Fig. 2: Pipeline used to isolate PRE and POST paralysis muscle specific**

607 **transcriptomes.** PAP expression construct places a FLAG-tagged *pab-1* under the control  
608 of a body muscle specific promotor (*Pmyo-3*) to isolate tissue-specific mRNA. PAP-  
609 expressing worms are crossed with *dys-1(cx18)* and *dys-1(eg33)* strains to establish new  
610 transgenic strains (DP1 and DP2) used in our muscle specific RNA-IPs. Worms were  
611 grown in solid culture on NGM plates and are sequenced directly for mixed stage IPs. The  
612 PRE and POST symptomatic datasets are obtained through sequential mechanical  
613 filtration. Muscle specific RNA-IPs are performed and sequenced in duplicate.

614

615 **Fig. 3: Summary of the muscle specific PAT-Seq results.** The heat map summarizes  
616 the average changes in gene expression of both dystrophin deficient strains (DP1 and  
617 DP2) as compared to the *wt* strain. White boxes in the heat map mark genes that are  
618 upregulated in DP1 and DP2 strains in PRE and POST datasets. An expansion of each of  
619 these groups details relative change in expression level for genes selected based on  
620 function and rank in our datasets. Below heat maps the change in expression level of  
621 several genes are graphed linearly between PRE and POST symptomatic stages (green:  
622 median between DP1 and DP2; orange: *wt*). GO term analysis of the top 50 genes  
623 uniquely present either in our PRE or POST datasets shows an enrichment in genes  
624 involved in mitochondria metabolism (PRE) and muscle biogenesis (POST).

625

626 **Fig. 4: A synthetic screen to identify genetically linked *dys-1* targets** (A) Single (*hlh-1*)  
627 or double (*hlh-1; dys-1*) mutant sample populations scored for paralysis at semi-permissive  
628 temperature after 48 hours after parent progeny are plated. Red arrows indicate worms  
629 that were scored as paralyzed based on defects in morphology and resulting lack of  
630 movement (B) Quantification and comparison of average incidence of paralysis for single  
631 and double mutant strains at semi-permissive temperature. At this temperature *dys-1* is  
632 responsible for a 21% increase in paralysis in the presence of an *hlh-1* sensitized genetic  
633 background. Average % paralysis of 10 replicate plates summarized above each strain. A  
634 total of 543 worms were scored for semi-permissive experiments without RNAi. (C)  
635 Overview of semi permissive RNAi screen protocol describing which steps occur at  
636 permissive and semi-permissive temperatures. (D) Percentage of paralyzed worms  
637 following RNAi for *dyb-1*, with average % paralysis of 5 replicate plates summarized

638 above each strain. (E) Synthetic paralysis RNAi assay. Each gene is displayed as the  
639 difference in paralysis observed between the *hlh-1* and *hlh-1;dys-1(cx18)* mutants and  
640 normalized to the difference of paralysis obtained from semi-permissive control screens  
641 (21%). Red dotted line indicates point of normalization for change in paralysis. Genes  
642 were grouped according to function (muscle structure and signaling). Percent increase  
643 change is shown on top of each bar chart.

644

## 645 DESCRIPTION OF ADDITIONAL DATA FILES

646

647 **Additional File 1: Figure 1:** Kaplan-Meier Survival Analysis. **Figure S2 :** Sequencing  
648 results. **Figure S3:** Validation and comparison with other studies. Differential gene  
649 expression analysis in PRE- and POST- symptomatic strains. **Figure S5:** Spearman  
650 correlation of read counts in DP1 (cx18) and DP2 (eg33) PRE and POST datasets. **Table**  
651 **S1:** Summary of results after deep sequencing. **Table S2:** Summary of sequencing results  
652 after mapping genes to WS250.

653

654

## REFERENCES

655

- 656 1. Koenig M, Beggs AH, Moyer M, Scherpf S, Heindrich K, Bettecken T, Meng G,  
657 Muller CR, Lindlof M, Kaariainen H, et al: **The molecular basis for Duchenne**  
658 **versus Becker muscular dystrophy: correlation of severity with type of**  
659 **deletion.** *Am J Hum Genet* 1989, **45**:498-506.
- 660 2. Zubrzycka-Gaarn EE, Bulman DE, Karpati G, Burghes AH, Belfall B, Klamut HJ,  
661 Talbot J, Hodges RS, Ray PN, Worton RG: **The Duchenne muscular dystrophy**  
662 **gene product is localized in sarcolemma of human skeletal muscle.** *Nature*  
663 1988, **333**:466-469.

- 664 3. Gawor M, Proszynski TJ: **The molecular cross talk of the dystrophin-**  
665 **glycoprotein complex.** *Ann N Y Acad Sci* 2018, **1412**:62-72.
- 666 4. Bridges LR: **The association of cardiac muscle necrosis and inflammation with**  
667 **the degenerative and persistent myopathy of MDX mice.** *J Neurol Sci* 1986,  
668 **72**:147-157.
- 669 5. Sharp NJ, Kornegay JN, Van Camp SD, Herbstreith MH, Secore SL, Kettle S, Hung  
670 WY, Constantinou CD, Dykstra MJ, Roses AD, et al.: **An error in dystrophin**  
671 **mRNA processing in golden retriever muscular dystrophy, an animal**  
672 **homologue of Duchenne muscular dystrophy.** *Genomics* 1992, **13**:115-121.
- 673 6. Whitehead NP, Yeung EW, Allen DG: **Muscle damage in mdx (dystrophic) mice:**  
674 **role of calcium and reactive oxygen species.** *Clin Exp Pharmacol Physiol* 2006,  
675 **33**:657-662.
- 676 7. Banks GB, Chamberlain JS: **The value of mammalian models for duchenne**  
677 **muscular dystrophy in developing therapeutic strategies.** *Curr Top Dev Biol*  
678 2008, **84**:431-453.
- 679 8. Ryu D, Zhang H, Ropelle ER, Sorrentino V, Mazala DA, Mouchiroud L, Marshall PL,  
680 Campbell MD, Ali AS, Knowels GM, et al: **NAD<sup>+</sup> repletion improves muscle**  
681 **function in muscular dystrophy and counters global PARylation.** *Sci Transl*  
682 *Med* 2016, **8**:361ra139.
- 683 9. Vila MC, Rayavarapu S, Hogarth MW, Van der Meulen JH, Horn A, Defour A,  
684 Takeda S, Brown KJ, Hathout Y, Nagaraju K, Jaiswal JK: **Mitochondria mediate**  
685 **cell membrane repair and contribute to Duchenne muscular dystrophy.** *Cell*  
686 *Death Differ* 2017, **24**:330-342.
- 687 10. Rybalka E, Timpani CA, Cooke MB, Williams AD, Hayes A: **Defects in**  
688 **mitochondrial ATP synthesis in dystrophin-deficient mdx skeletal muscles**  
689 **may be caused by complex I insufficiency.** *PLoS One* 2014, **9**:e115763.
- 690 11. Timpani CA, Hayes A, Rybalka E: **Revisiting the dystrophin-ATP connection:**  
691 **How half a century of research still implicates mitochondrial dysfunction in**  
692 **Duchenne Muscular Dystrophy aetiology.** *Med Hypotheses* 2015, **85**:1021-1033.
- 693 12. Gieseler K, Qadota H, Benian GM: **Development, structure, and maintenance of**  
694 **C. elegans body wall muscle.** *WormBook* 2017, **2017**:1-59.
- 695 13. Altun ZF, Herndon, L.A., Wolkow, C.A., Crocker, C., Lints, R. and Hall, D.H.:  
696 **WormAtlas.** 2002-2018.
- 697 14. Bessou C, Giugia JB, Franks CJ, Holden-Dye L, Segalat L: **Mutations in the**  
698 **Caenorhabditis elegans dystrophin-like gene dys-1 lead to hyperactivity and**  
699 **suggest a link with cholinergic transmission.** *Neurogenetics* 1998, **2**:61-72.
- 700 15. Oh KH, Kim H: **Reduced IGF signaling prevents muscle cell death in a**  
701 **Caenorhabditis elegans model of muscular dystrophy.** *Proc Natl Acad Sci U S*  
702 *A* 2013, **110**:19024-19029.
- 703 16. Marsh EK, May RC: **Caenorhabditis elegans, a model organism for**  
704 **investigating immunity.** *Appl Environ Microbiol* 2012, **78**:2075-2081.
- 705 17. Roy PJ, Stuart JM, Lund J, Kim SK: **Chromosomal clustering of muscle-**  
706 **expressed genes in Caenorhabditis elegans.** *Nature* 2002, **418**:975-979.
- 707 18. Blazie SM, Babb C, Wilky H, Rawls A, Park JG, Mangone M: **Comparative RNA-**  
708 **Seq analysis reveals pervasive tissue-specific alternative polyadenylation in**  
709 **Caenorhabditis elegans intestine and muscles.** *BMC Biol* 2015, **13**:4.

- 710 19. Blazie SM, Geissel HC, Wilky H, Joshi R, Newbern J, Mangone M: **Alternative**  
711 **Polyadenylation Directs Tissue-Specific miRNA Targeting in Caenorhabditis**  
712 **elegans Somatic Tissues.** *Genetics* 2017, **206**:757-774.
- 713 20. Khraiwesh B, Salehi-Ashtiani K: **Alternative Poly(A) Tails Meet miRNA Targeting**  
714 **in Caenorhabditis elegans.** *Genetics* 2017, **206**:755-756.
- 715 21. Yang Z, Edenberg HJ, Davis RL: **Isolation of mRNA from specific tissues of**  
716 **Drosophila by mRNA tagging.** *Nucleic Acids Res* 2005, **33**:e148.
- 717 22. Lemay JF, Lemieux C, St-Andre O, Bachand F: **Crossing the borders: poly(A)-**  
718 **binding proteins working on both sides of the fence.** *RNA Biol* 2010, **7**:291-295.
- 719 23. Frokjaer-Jensen C: **Transposon-Assisted Genetic Engineering with Mos1-**  
720 **Mediated Single-Copy Insertion (MosSCI).** *Methods Mol Biol* 2015, **1327**:49-58.
- 721 24. Shen Q, Qin F, Gao Z, Cui J, Xiao H, Xu Z, Yang C: **Adenine nucleotide**  
722 **translocator cooperates with core cell death machinery to promote apoptosis**  
723 **in Caenorhabditis elegans.** *Mol Cell Biol* 2009, **29**:3881-3893.
- 724 25. Farina F, Alberti A, Breuil N, Bolotin-Fukuhara M, Pinto M, Culetto E: **Differential**  
725 **expression pattern of the four mitochondrial adenine nucleotide transporter**  
726 **ant genes and their roles during the development of Caenorhabditis elegans.**  
727 *Dev Dyn* 2008, **237**:1668-1681.
- 728 26. Gieseler K, Grisoni K, Segalat L: **Genetic suppression of phenotypes arising**  
729 **from mutations in dystrophin-related genes in Caenorhabditis elegans.** *Curr*  
730 *Biol* 2000, **10**:1092-1097.
- 731 27. Harfe BD, Branda CS, Krause M, Stern MJ, Fire A: **MyoD and the specification of**  
732 **muscle and non-muscle fates during postembryonic development of the C.**  
733 **elegans mesoderm.** *Development* 1998, **125**:2479-2488.
- 734 28. Bakay M, Zhao P, Chen J, Hoffman EP: **A web-accessible complete**  
735 **transcriptome of normal human and DMD muscle.** *Neuromuscul Disord* 2002,  
736 **12 Suppl 1**:S125-141.
- 737 29. Kho AT, Kang PB, Kohane IS, Kunkel LM: **Transcriptome-scale similarities**  
738 **between mouse and human skeletal muscles with normal and myopathic**  
739 **phenotypes.** *BMC Musculoskelet Disord* 2006, **7**:23.
- 740 30. Porter JD, Merriam AP, Leahy P, Gong B, Feuerman J, Cheng G, Khanna S:  
741 **Temporal gene expression profiling of dystrophin-deficient (mdx) mouse**  
742 **diaphragm identifies conserved and muscle group-specific mechanisms in**  
743 **the pathogenesis of muscular dystrophy.** *Hum Mol Genet* 2004, **13**:257-269.
- 744 31. Onopiuk M, Brutkowski W, Wierzbicka K, Wojciechowska S, Szczepanowska J,  
745 Fronk J, Lochmuller H, Gorecki DC, Zablocki K: **Mutation in dystrophin-encoding**  
746 **gene affects energy metabolism in mouse myoblasts.** *Biochem Biophys Res*  
747 *Commun* 2009, **386**:463-466.
- 748 32. Cole MA, Rafael JA, Taylor DJ, Lodi R, Davies KE, Styles P: **A quantitative study**  
749 **of bioenergetics in skeletal muscle lacking utrophin and dystrophin.**  
750 *Neuromuscul Disord* 2002, **12**:247-257.
- 751 33. Even PC, Decrouy A, Chinet A: **Defective regulation of energy metabolism in**  
752 **mdx-mouse skeletal muscles.** *Biochem J* 1994, **304 ( Pt 2)**:649-654.
- 753 34. Kuznetsov AV, Winkler K, Wiedemann FR, von Bossanyi P, Dietzmann K, Kunz WS:  
754 **Impaired mitochondrial oxidative phosphorylation in skeletal muscle of the**  
755 **dystrophin-deficient mdx mouse.** *Mol Cell Biochem* 1998, **183**:87-96.

- 756 35. Passaquin AC, Renard M, Kay L, Challet C, Mokhtarian A, Wallimann T, Ruegg UT:  
757 **Creatine supplementation reduces skeletal muscle degeneration and**  
758 **enhances mitochondrial function in mdx mice.** *Neuromuscul Disord* 2002,  
759 **12:174-182.**
- 760 36. Hewitt JE, Pollard AK, Lesanpezeshki L, Deane CS, Gaffney CJ, Etheridge T,  
761 Szewczyk NJ, Vanapalli SA: **Muscle strength deficiency and mitochondrial**  
762 **dysfunction in a muscular dystrophy model of *Caenorhabditis elegans* and its**  
763 **functional response to drugs.** *Dis Model Mech* 2018, **11.**
- 764 37. Rospert S, Dubaquie Y, Gautschi M: **Nascent-polypeptide-associated complex.**  
765 *Cell Mol Life Sci* 2002, **59:1632-1639.**
- 766 38. Bloss TA, Witze ES, Rothman JH: **Suppression of CED-3-independent**  
767 **apoptosis by mitochondrial betaNAC in *Caenorhabditis elegans*.** *Nature* 2003,  
768 **424:1066-1071.**
- 769 39. Langmead B, Salzberg SL: **Fast gapped-read alignment with Bowtie 2.** *Nat*  
770 *Methods* 2012, **9:357-359.**
- 771 40. Li H, Handsaker B, Wysoker A, Fennell T, Ruan J, Homer N, Marth G, Abecasis G,  
772 Durbin R, Genome Project Data Processing S: **The Sequence Alignment/Map**  
773 **format and SAMtools.** *Bioinformatics* 2009, **25:2078-2079.**
- 774 41. Trapnell C, Williams BA, Pertea G, Mortazavi A, Kwan G, van Baren MJ, Salzberg  
775 SL, Wold BJ, Pachter L: **Transcript assembly and quantification by RNA-Seq**  
776 **reveals unannotated transcripts and isoform switching during cell**  
777 **differentiation.** *Nat Biotechnol* 2010, **28:511-515.**
- 778 42. Park HH, Jung Y, Lee SV: **Survival assays using *Caenorhabditis elegans*.** *Mol*  
779 *Cells* 2017, **40:90-99.**
- 780 43. Stiernagle T: **Maintenance of *C. elegans*.** *WormBook* 2006:1-11.
- 781 44. Fraser AG, Kamath RS, Zipperlen P, Martinez-Campos M, Sohrmann M, Ahringer J:  
782 **Functional genomic analysis of *C. elegans* chromosome I by systematic RNA**  
783 **interference.** *Nature* 2000, **408:325-330.**



Fig. 1

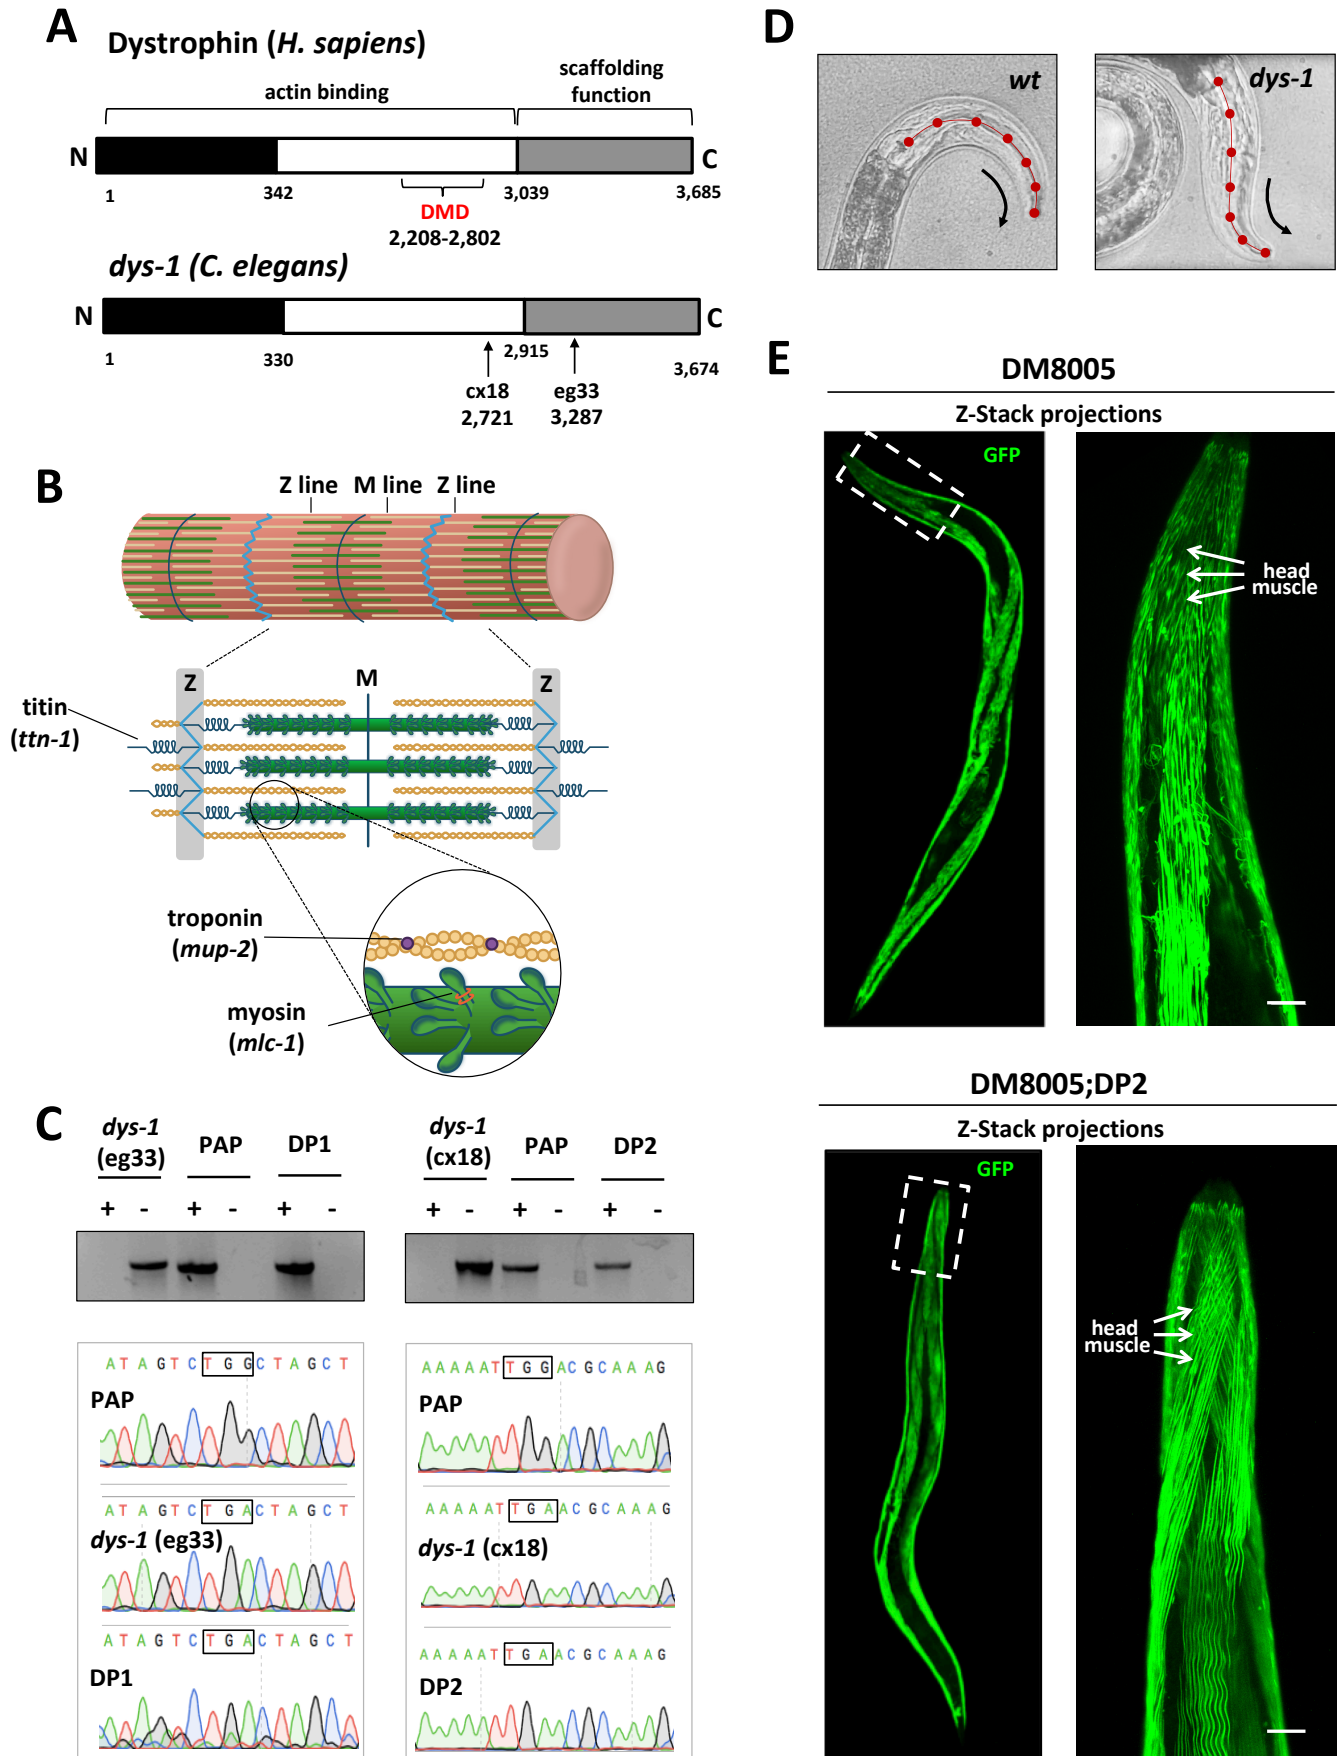

Fig. 2

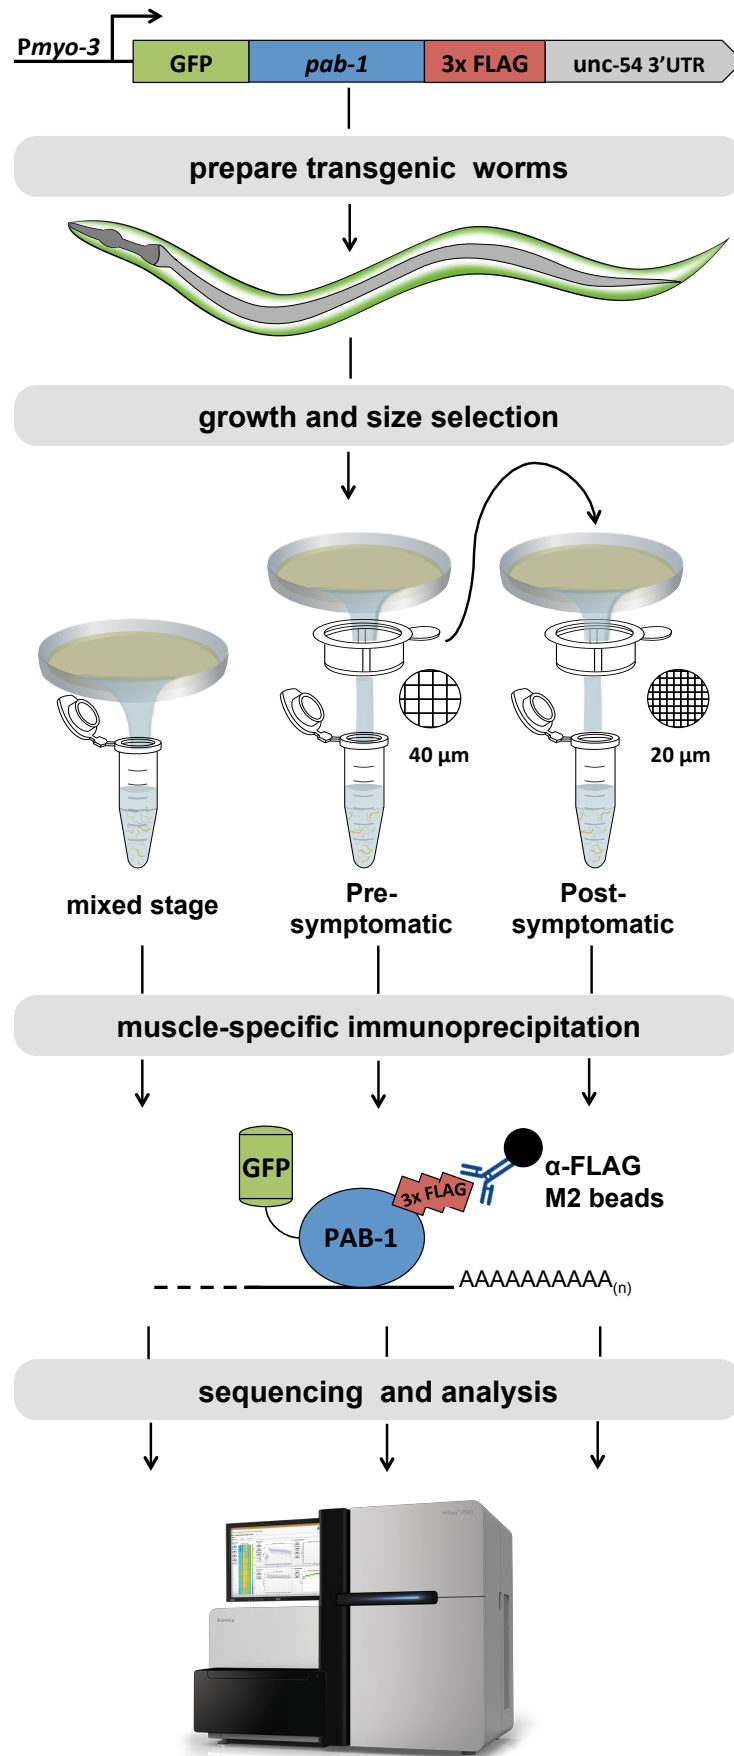

Fig. 3

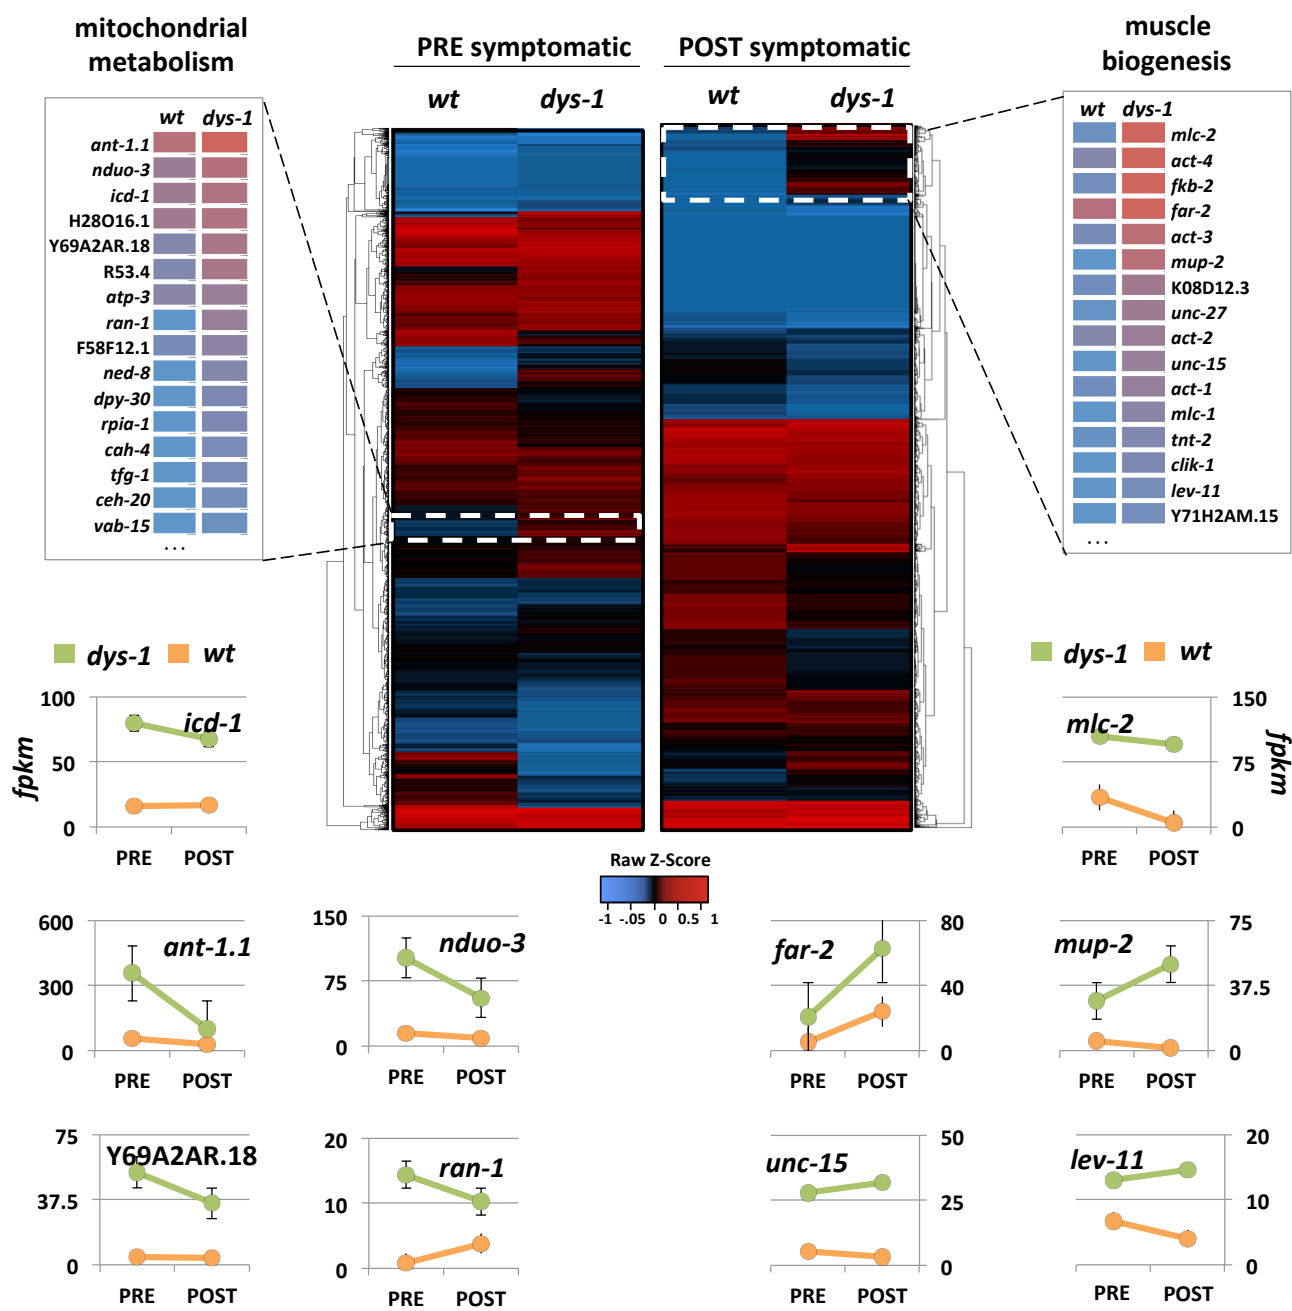

PRE symptomatic

| id         | description                           | q-value  | hits | total |
|------------|---------------------------------------|----------|------|-------|
| GO:0005739 | mitochondrion                         | 6.96E-10 | 20   | 136   |
| GO:0015992 | proton transport                      | 1.85E-03 | 5    | 11    |
| GO:0044281 | small molecule metabolic process      | 2.24E-03 | 16   | 229   |
| GO:0006818 | hydrogen transport                    | 2.24E-03 | 5    | 12    |
| GO:0003012 | muscle system process                 | 5.76E-03 | 7    | 42    |
| GO:0006937 | regulation of muscle contraction      | 1.05E-02 | 5    | 20    |
| GO:0010941 | regulation of cell death              | 1.44E-02 | 7    | 56    |
| GO:0046034 | ATP metabolic process                 | 1.51E-02 | 5    | 24    |
| GO:0015672 | monovalent inorganic cation transport | 1.51E-02 | 6    | 39    |
| GO:0042981 | regulation of apoptotic process       | 2.69E-02 | 5    | 29    |

POST symptomatic

| id         | description                          | q-value  | hits | total |
|------------|--------------------------------------|----------|------|-------|
| GO:0005856 | cytoskeleton                         | 1.29E-07 | 18   | 153   |
| GO:0043292 | contractile fiber                    | 2.50E-05 | 5    | 11    |
| GO:0046034 | ATP metabolic process                | 4.90E-05 | 5    | 20    |
| GO:0046034 | ATP metabolic process                | 4.90E-05 | 7    | 24    |
| GO:0005739 | mitochondrion                        | 1.27E-04 | 7    | 56    |
| GO:0030239 | myofibril assembly                   | 1.67E-04 | 16   | 229   |
| GO:0055001 | muscle cell development              | 2.07E-04 | 5    | 12    |
| GO:0051146 | striated muscle cell differentiation | 2.07E-04 | 13   | 145   |
| GO:0061061 | muscle structure development         | 3.34E-04 | 14   | 178   |
| GO:0042692 | muscle cell differentiation          | 4.44E-04 | 13   | 158   |

Fig. 4

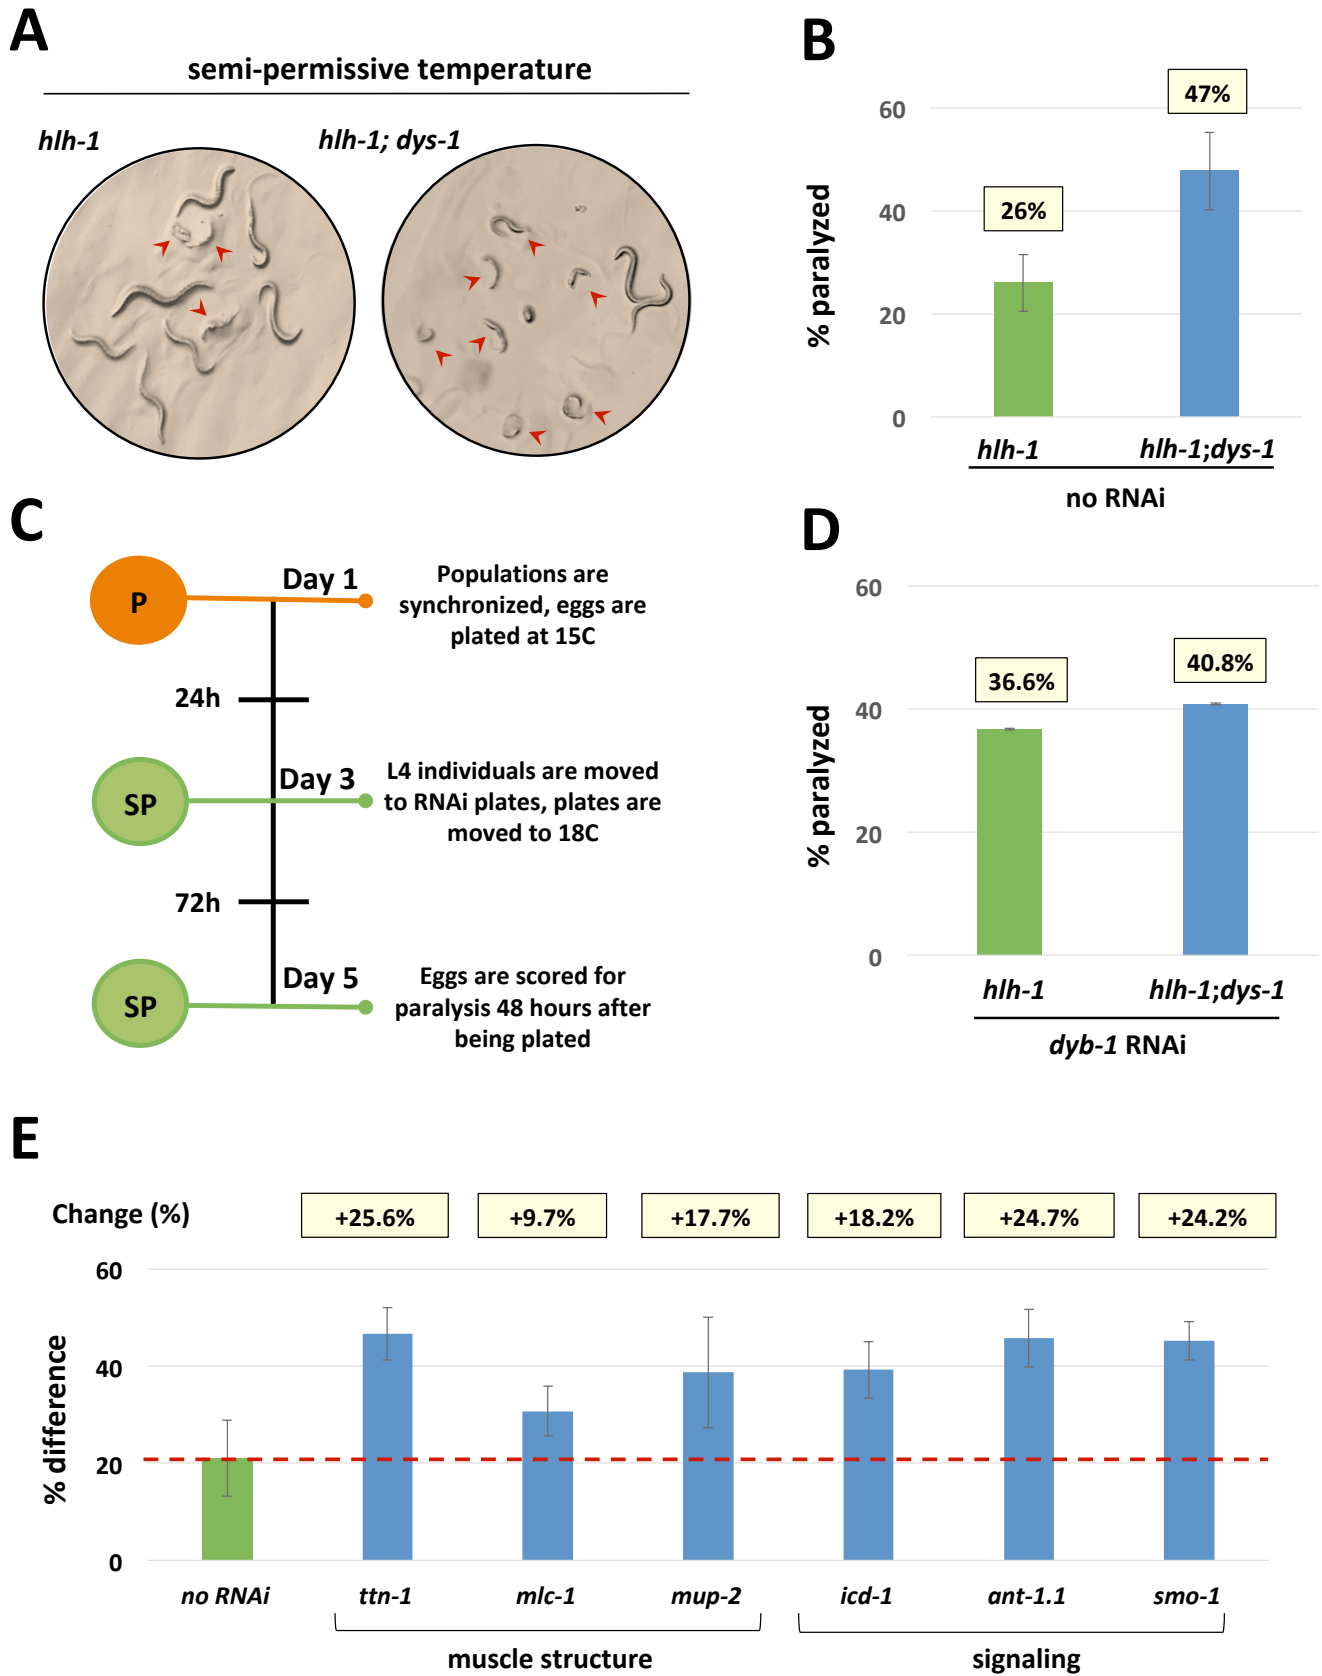

Source: https://www.biorxiv.org/content/10.1101/532465v1.full.pdf
